# Supplementary material
Source: ML conference proceedings conference paper supplement (https://proceedings.neurips.cc/paper_files/paper/2020/hash/630eff1b380505a67570dff952ce4ad7-Abstract.html)

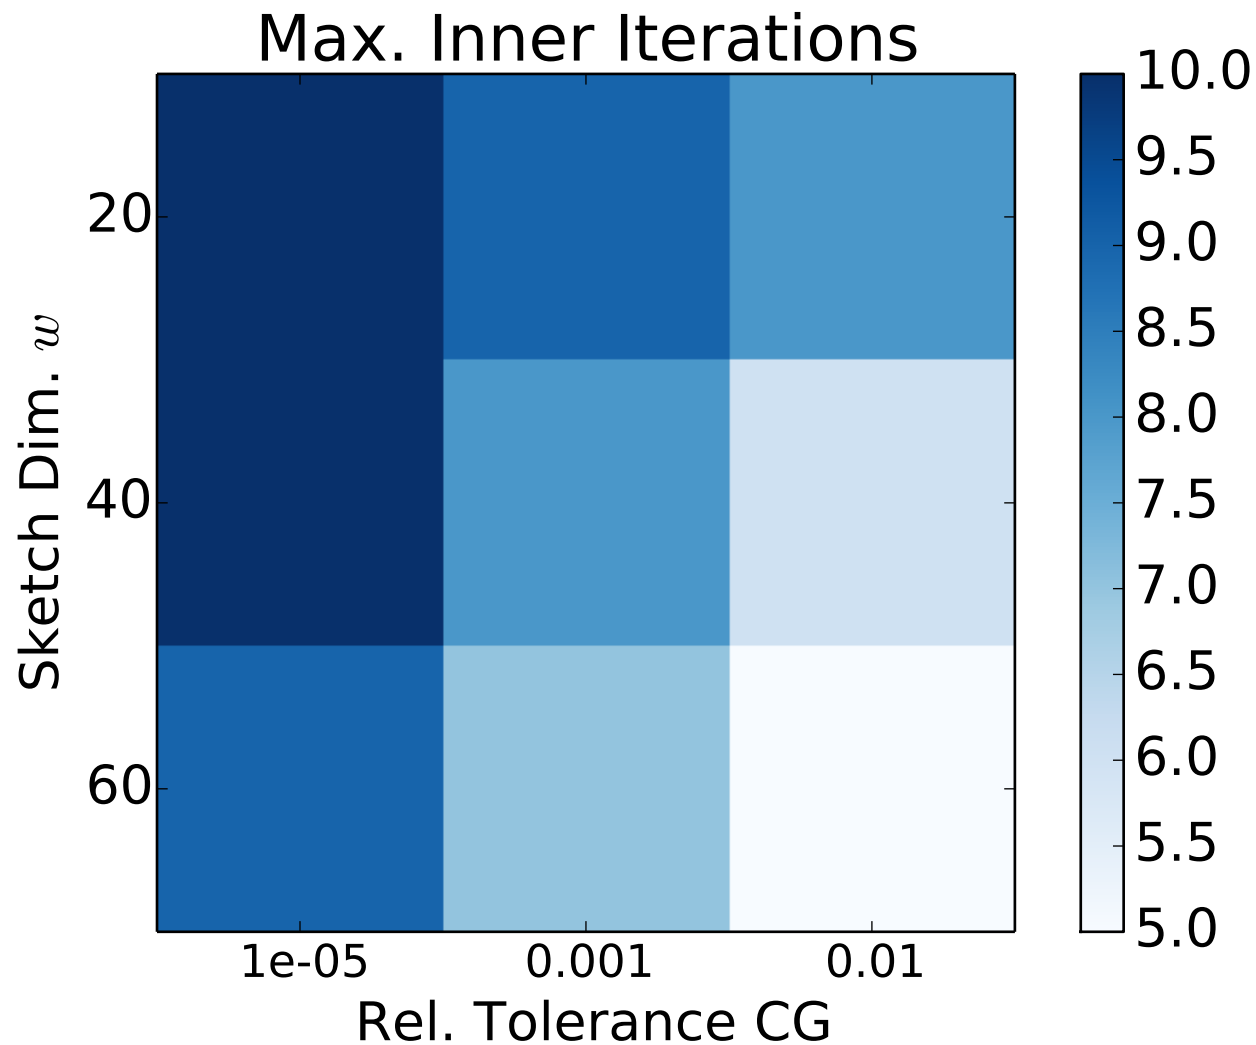

Supplement: Supplementary file [file 630eff1b380505a67570dff952ce4ad7-Supplemental.zip]
